# Supplementary material
Source: Springer Nature journal article supplement (https://www.springermedizin.de/resource/supplementary/13054_2009_8364_MOESM2_ESM.pdf/9731798)

# ROC Curve

Sensitivity

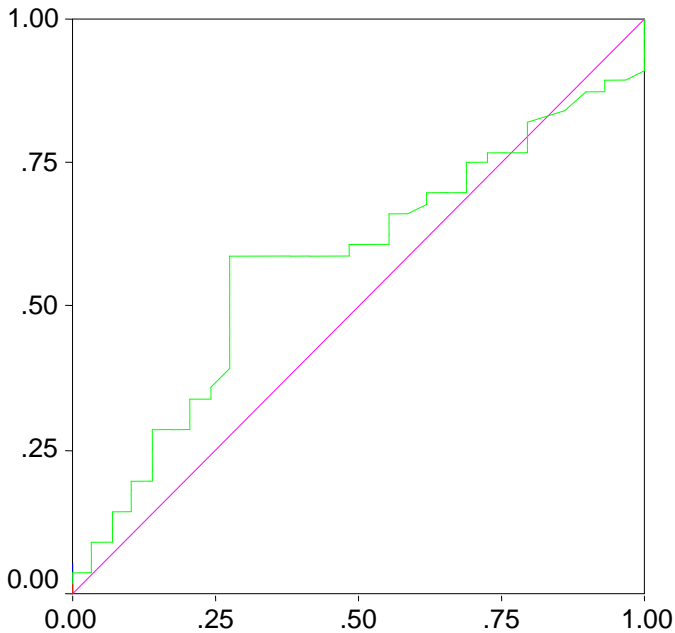

1 - Specificity

**AUC:  $0.576 \pm 0.06$ ; CI 95% 0.450 to 0.701**

Supplement: MOESM2 [file 9731798]
